# Supplementary material for: Genome-wide chromatin mapping with size resolution reveals a dynamic sub-nucleosomal landscape in Arabidopsis
Source: PLoS Genet. 2017 Sep 13;13(9):e1006988. doi: 10.1371/journal.pgen.1006988 (PMC5597176; doi:10.1371/journal.pgen.1006988)
Supplement: S1 Fig — (XLSX) [file pgen.1006988.s001.xlsx]

## Sheet: Sheet1
		Peaks Detected (danpos)
	Sample	NSP midpoints	NSP and multiNSP (>120bp)	subNSP (above sample mean)
	Light-L1	708769	655107	123182
	Light-H1	745810	652188	247953
	Dark-L1	741788	655505	112142
	Dark-H1	746604	659229	256520
	Light-L2	743139	657663	115185
	Light-H2	741962	658550	149680
	Dark-L2	747442	661749	182536
	Dark-H2	740338	639228	173107
	μ	739482	654902	170038
	σ	12666	6969.13	56928.8
